1 **Title:**

2 Using random effects in generalized linear mixed-effects models: assessing a common ‘rule of  
3 thumb’

4

5 Dylan G.E. Gomes<sup>1,2,\*</sup>

6 <sup>1</sup> Department of Biological Sciences, Boise State University, 1910 University Dr., Boise, ID,  
7 United States, 83725

8 <sup>2</sup> Cooperative Institute for Marine Resources Studies, Hatfield Marine Science Center, Oregon  
9 State University, 2030 SE Marine Science Dr., Newport, OR, United States, 97365

10 \* Correspondence: [gomesd@oregonstate.edu](mailto:gomesd@oregonstate.edu); [dylangomes@u.boisestate.edu](mailto:dylangomes@u.boisestate.edu)

11

12 **Abstract**

13 As (generalized) linear mixed-effects models (GLMMs) have become a widespread tool in  
14 ecology, the need to guide the use of such tools is increasingly important. One common 'rule of  
15 thumb' is that one needs at least five levels of a random effect. Having such few levels makes the  
16 estimation of the variance of random effects terms difficult, but it need not muddy one's ability to  
17 estimate fixed effects terms. Here, I use simulated datasets and model fitting to show that having  
18 too few random effects terms does not influence the parameter estimates or uncertainty around  
19 those estimates for fixed effects terms. Thus, it should be acceptable to use fewer levels of  
20 random effects if one is not interested in making inference about variance estimates of the

21 random effects terms (i.e. they are 'nuisance' parameters). I also assess the potential for pseudo-  
22 replication in (generalized) linear models (LMs), when random effects are explicitly ignored and  
23 find that LMs do not show increased type-I errors compared to their mixed-effects model  
24 counterparts. These results challenge the view that it is never appropriate to model random  
25 effects terms with fewer than five levels – when inference is not being made for the random  
26 effects, it may not pose problems. Given the widespread accessibility of GLMMs, future  
27 simulation studies and further assessments of these statistical methods are necessary to  
28 understand the consequences of both violating and blindly following ‘rules of thumb.’

29

### 30 **Keywords**

31 Statistics, hierarchical modelling, experimental design, block-design, varying effects,  
32 quantitative, regression, ANOVA, R, programming

### 33 **Introduction**

34 While statistical analyses are becoming more complex (Low-Décarie, Chivers & Granados,  
35 2014), advances in computing power and freely available statistical software are increasing the  
36 accessibility of such analyses. As these methods have become more complex and accessible to  
37 non-statisticians, the need to guide the use of such tools is becoming increasingly important  
38 (Bolker, 2008; Bolker et al., 2009; Zuur, Ieno & Elphick, 2010; Kéry & Royle, 2015; Kass et al.,  
39 2016; Zuur & Ieno, 2016; Harrison et al., 2018; Silk, Harrison & Hodgson, 2020). The use of  
40 generalized linear mixed-effects models (GLMM), for example, has become a widespread tool  
41 that allows one to build hierarchical models that can estimate, and thus account for, imperfect  
42 detection in biological surveys (e.g. occupancy, N-mixture, mark-recapture, etc. models) and can  
43 model correlations among data that come from groups (i.e. random effects; also known as  
44 varying effects) (Bolker, 2008; Kéry & Royle, 2015; Powell & Gale, 2015; Harrison et al., 2018;  
45 McElreath, 2020).

46 Generalized linear mixed-effects models are a regression type analysis that are flexible in that  
47 they can handle a variety of data generating processes such as binomial (e.g. presence / absence)  
48 and Poisson (e.g. survey counts). When the sampling distribution is Gaussian (also known as  
49 normal), this is a special case of a GLMM that is referred to as simply a linear mixed-effects  
50 model (LMM). GLMMs (and LMMs) differ from their simpler counterparts, (generalized) linear  
51 models (GLMs and LMs), in that they include random effects, in addition to the fixed effects  
52 (hence *mixed-effects*). Fixed effects (which are also often called predictors, covariates,  
53 explanatory or independent variables) are *fixed* in that the model parameters ( $\beta$  in equation 1  
54 below) are fixed, or non-random, and are not drawn from a distribution. Random effects are  
55 *random* in that they are assumed to be drawn randomly from a distribution – often a Gaussian

56 distribution – during the data-generating process. Note that one can also assign random *slopes* to  
57 variables, where the slopes of variables (not just the intercepts) are allowed to vary, and are  
58 assumed to be randomly drawn from a distribution (see Bolker, 2008; Kéry & Royle, 2015;  
59 Harrison et al., 2018).

60 The advantages of random effects are multifold; they allow one to combine information (as in a  
61 meta-analysis), deal with spatiotemporal autocorrelation, use partial pooling to borrow strength  
62 from other populations or groups, account for grouping or blocked designs, and estimate  
63 population-level parameters, among others (Kéry & Royle, 2015). If we are interested in the  
64 variability of a population (of individuals, groups, sites, or populations), it is difficult to estimate  
65 this variation with too few levels of individuals, groups, sites, or populations (i.e. random effects  
66 terms).

67 “When the number of groups is small (less than five, say), there is typically not enough  
68 information to accurately estimate group-level variation” (Gelman & Hill, 2006).

69 “...if interest lies in measuring the variation among random effects, a certain number is  
70 required...To obtain an adequate estimate of the among-population heterogeneity – that  
71 is, the variance parameter – at least 5 - 10 populations might be required” (Kéry &  
72 Royle, 2015).

73 “With <5 levels, the mixed model may not be able to estimate the among-population  
74 variance accurately.” (Harrison et al., 2018).

75 This ‘rule of thumb’ that random effects terms should have at least five levels (i.e. groups) is  
76 backed by limited empirical evidence (Harrison, 2015), but it is intuitive that too few draws from  
77 distribution will hinder one’s ability to estimate the variance of that distribution. Indeed, in each

78 of the above segments of quoted text, the authors suggest that at least 5 levels are needed for  
79 *estimation of group-level, or among-population, variance*. However, this rule is often adhered to  
80 out of context, where authors or reviewers suggest that one cannot use random effects terms if  
81 they do not contain at least five levels.

82 Simulations by Harrison (2015) demonstrate that random effects variance can be biased more  
83 strongly when the levels of random effects terms are low, yet in this work it appears that slope  
84 (beta) estimates for fixed effects terms are generally not more biased with only three random  
85 effects levels compared to five. There are many cases (and some would argue that in *most cases*,  
86 see below) in which the variance of random effects is not directly of interest to the research  
87 question at hand.

88 “...in the vast majority of examples of random-effects (or mixed) models in ecology, the  
89 random effects do *not* have a clear ecological interpretation. Rather, they are merely  
90 abstract constructs invoked to explain the fact that some measurements are more similar  
91 to each other than others are – i.e., to model correlations in the observed data” (Kéry &  
92 Royle, 2015).

93 Thus, it is unclear whether or not it is appropriate to use random effects when there are fewer  
94 than five grouping levels in situations where one does not directly care about ‘nuisance’ among-  
95 population variance, but instead is interested in estimates and the variance (i.e. uncertainty) of  
96 predictor variables (i.e. fixed effects). The current state of practice in ecology is to drop the  
97 random effects terms such that we are now using generalized linear models where we are not  
98 grouping observations (we drop the **Mixed-effects** from the GLMM to become GLM). I question  
99 whether we are choosing to accept pseudoreplication of repeat-measures (Hurlbert, 1984; Kéry

100 & Royle, 2015), rather than inaccurate estimates of among-population variance. In cases where  
101 one does not care about among-population variance, this tradeoff may be non-existent, but little  
102 research exists to support this. Here, I perform simulations to assess whether *fixed effects*  
103 estimates are more biased when the accompanying *random effects* consist of fewer than five  
104 levels; I also ask whether using an alternative model without random effects (GLMs) leads to  
105 higher type I errors (demonstrating a ‘significant’ effect when in fact one does not exist).

106

107

## 108 **Methodology**

109 All simulation of datasets and model fitting was done in R v4.0.4 (R Core Team, 2017), all  
110 visualizations were completed using the aid of R package `ggplot2` (Wickham, 2011), and all  
111 code is available from Zenodo at <http://doi.org/10.5281/zenodo.4679101>.

112

### 113 *Data generation*

114 I used a modified version of code from Harrison (2015), to explore the importance of varying  
115 two parameters in a linear mixed-effect model (LMM): the number of observations in a dataset  
116 (30, 60, or 120), and the number of levels of the random intercept term (3, 5, or 20). This was  
117 done by generating a response variable  $y_i$  from the following equation:

$$y_i = \alpha_{j(i)} + \beta_1 X_{1_i} + \beta_2 X_{2_i} + \varepsilon_i$$

118

[1]

$$\alpha_j \sim \text{Normal}(\mu, \sigma)$$

119 [2]

120 Where  $\alpha_{j(i)}$  is the intercept for site (or population)  $j$  to which observation (or individual)  $i$   
121 belongs. Thus, each observation shared a site-level intercept, which were drawn from a normal  
122 distribution with mean ( $\mu$ ) = 0 and standard deviation ( $\sigma$ ) = 0.5.  $\beta_1$  and  $\beta_2$  are the slope  
123 parameters for two generic predictor variables ( $X_{1_i}$  and  $X_{2_i}$  respectively), which were both drawn  
124 from a normal distribution with  $\mu = 0$  and  $\sigma = 0.5$ , which mimics standardized variables that are  
125 centered by their mean and scaled by two standard deviations (Gelman, 2008). The error term  $\varepsilon_i$   
126 is unique to each observation  $i$  that is drawn from a normal distribution with  $\mu_\varepsilon = 0$  and  $\sigma_\varepsilon = 0.25$   
127 (same as equation 2 above).

128 For all simulated datasets, parameter values were fixed at  $\beta_1 = 2$  and  $\beta_2 = 0$ , meaning  $X_{2_i}$  does  
129 not have a linear relationship with, or is only randomly related to, the response variable  $y_i$ . This  
130 allows for an assessment of type-I error rate, since any significant  $p$  values for this  $\beta_2$  slope  
131 parameter are erroneous.

132

### 133 *Model fitting simulations*

134 For each of the nine combinations of scenarios (30, 60, or 120 observations by 3, 5, or 20  
135 random intercept levels), I simulated 10,000 datasets. Each dataset was fit with a linear mixed-  
136 effect model (LMM) and a linear model (LM). All model fitting was done with R functions  
137 ``lmer`` (LMM) or ``lm`` (LM) in the package ``lme4`` or in ``base`` R, respectively (Bates et al.,  
138 2007; R Core Team, 2017).

139 #LMM:

```
140 m1 <- lmer(y ~ x1 + x2 + (1|Site))
```

141 R Code

142 Where  $x_1$  and  $x_2$  are fixed effects (see equation 1), and  $(1|Site)$  is the syntax for specifying a  
143 random intercept ( $\alpha_{j(i)}$  in equation 1). In ecology, we often fit independent sites as unique levels  
144 of a random effect, so I use site here for demonstration purposes. But site can be replaced with  
145 individual, group, population, etc.

146 Often the recommendation, if one has fewer than 5 levels of random effects terms ( $j \leq 5$  in  $\alpha_{j(i)}$ ),  
147 is to fit the random effects as fixed effects (LMM becomes LM), specified in R as:

148 #LM:

```
149 m2 <- lm(y ~ x1 + x2 + Site)
```

150 R Code

151 and mathematically defined as:

$$y_i = \beta_1 X_{1_i} + \beta_2 X_{2_i} + \beta_3 Site_{1(i)} + \beta_4 Site_{2(i)} + \dots + \beta_{n+2} Site_{n(i)} + \varepsilon_i$$

152 [3]

153 Now a  $\beta$  term is estimated for each site (or population) level independently. Site parameters no  
154 longer come from a normal distribution (as in equation 2), but instead are considered fixed,  
155 hence *fixed effects*.

156 Thus, both a LMM and a LM were fit to each simulated dataset ( $n = 10,000$ ) of each of the nine  
157 combinations (30, 60, or 120 observations by 3, 5, or 20 random intercept levels) of data-



158 generation. This allowed for a comparison of the type-I error rates of LMMs and LMs, the latter  
159 of which ignores the blocked structure of data (i.e. site-level grouping).

160

### 161 *Type-I error calculation*

162 Type-I error rate was calculated as the proportion of 10,000 models that a ‘significant’ p value of  
163  $\leq 0.05$  was obtained for the  $\beta_2$  parameter estimate in which the true value of that parameter was  
164 set to be 0. I sampled (with replacement) 10,000 p value ‘observations’ from each group of  
165 10,000 models to produce a new proportion of type-I error; this process was repeated 1,000  
166 times, and the bootstrapped 95% confidence intervals were calculated as the 0.025 and 0.975  
167 quantiles of those 1,000 replications (see code).

168

169

## 170 **Results**

### 171 *Estimating model parameters and uncertainty*

172 Linear mixed models were able to resurrect simulated fixed effect relationships with no  
173 noticeable patterns in bias, regardless of number of levels of random effects or sample size. That  
174 is, both mean model parameter estimates ( $\beta_1$  and  $\beta_2$ ) were centered on their true values (Table 1;  
175 Figure 1). The uncertainty around these estimates generally decreased as sample size increased.  
176 For example, doubling the sample size from 30 observations to 60 observations lead to a  
177 decrease by 36.6% and 35.5% in parameter estimate uncertainty (for  $\beta_1$  and  $\beta_2$  respectively;  
178 Table 1; Figure 1). Another doubling to 120 observations lead to a further decrease in uncertainty

179 by 33.4% and 32.9%, respectively. The number of levels of random effects appears to be  
180 relatively non-important in resurrecting model parameter estimates within these simulation  
181 scenarios (Table 1; Figure 1); instead there were small, likely negligible, increases in uncertainty  
182 around fixed effect parameter estimates as the number of levels of random effects increased.

183 All LMM estimates of the distribution mean ( $\mu$ ) were unbiased, regardless of number of levels of  
184 random effects or sample size (Table 1; Figure 2A). The random effects variance ( $\sigma$ ), however,  
185 was not centered at the true value, and it was more biased with fewer levels of random effects,  
186 whereas sample size did not affect this bias (Table 1; Figure 2B). That is, with only three levels  
187 of random effects the magnitude of the bias was 12.2% of the true value. Increasing to five levels  
188 of random effects nearly halved this bias to 6.4%, and increasing to 10 levels halved the bias  
189 again to 3.2% of the true value. Averaged across numbers of random effects terms, estimates  
190 were biased by about 7% regardless of sample size (7.1%, 7.4%, and 7.2% for  $N = 30, 60,$  and  
191 120 respectively).

192 The uncertainty around random effects estimates ( $\mu$  and  $\sigma$ ) showed the reverse pattern as the  
193 fixed effects. That is uncertainty generally decreased with an increased number of random effects  
194 levels, whereas sample size did little to alleviate this uncertainty (Table 1; Figure 2). Increasing  
195 the number of random effects levels from 3 to 5, and then from 5 to 10, decreased the uncertainty  
196 for  $\mu$  by 22.4% and 29.1%, respectively, and for  $\sigma$  by 26.6% and 29.8% respectively.

197

### 198 *Type-I errors*

199 For all simulated datasets, both LMM and LM produced type-I error rates around the typical  $\alpha =$   
200 0.05, with 95% confidence intervals overlapping this value. Neither sample size, nor the number

201 of random effects levels seemed to influence the type-I error rate. Furthermore, dropping the  
202 random effects structure (using a LM instead of a LMM) did not increase the probability type-I  
203 errors (Figure 3).

204

## 205 **Discussion**

206 The work presented here demonstrates that i) fixed effects estimates are not more biased when  
207 the levels of an accompanying random effect have fewer than five ( $n \leq 5$ ) levels, but population-  
208 level variance estimates are and ii) type-I error rates are not increased by using LM instead of  
209 LMM, contrary to previous expectations.

210 These results suggest that fixed effects parameter estimation is not strongly influenced by, nor  
211 biased by, the number of levels of random effects terms, but uncertainty in those estimates is  
212 much more strongly influenced by sample size. While this pattern may appear to contradict the  
213 decreased uncertainty around beta estimates in Figure 2 of Harrison (2015), this instead is due to  
214 differences in the way that sample size was handled between that work and the current work.  
215 Harrison (2015) coded each random effect level to be associated with a fixed number of  
216 observations ( $N=20$ ), such that each additional random effect level yielded an increased sample  
217 size. Here, sample size (i.e. number of observations) has been separated from the number of  
218 random effects terms.

219 Despite this difference, the estimation of random effects terms ( $\mu$  and  $\sigma$ ) in the simulations  
220 presented here suggest consistent patterns with Harrison (2015) and support previous ‘rules of  
221 thumb’ and simulations suggesting that fewer than five levels of random effects terms can make  
222 estimation of population-level variance difficult (Gelman & Hill, 2006; Harrison, 2015; Kéry &

223 Royle, 2015; Harrison et al., 2018). Thus, the combination of these results suggest that using  
224 fewer than five levels of random effects is acceptable when one is only interested in estimating  
225 fixed effects parameters; in other words, when inference about the variance of random effects  
226 terms (e.g. sites, individuals, populations) is not of direct interest, but instead are used to group  
227 data, as in a block design of a study. In these cases, however, caution should be taken in  
228 reporting the variance estimates for such population-level parameters – as this information can  
229 later be taken out of context of the question at hand.

230 Interestingly, type-I errors were not more likely in any situation. This possibly suggests that mis-  
231 specified linear models that are theoretically missing a random effect are relatively robust to this  
232 omission – at least in some simple cases such as the scenarios presented here. While this perhaps  
233 alleviates some concern over inflated type-I errors due to pseudoreplication while ignoring the  
234 grouped nature of repeat-measures studies and non-independent data, this should not be taken as  
235 evidence to purposefully omit random effects when such a structure is appropriate. Instead, it  
236 warrants future investigation and further simulation studies with more thorough scenarios and  
237 more complex data structures.

238 Often researchers or reviewers cite this ‘rule of thumb’ as to why one should not use a mixed-  
239 effects model, leaving others to fight their case as to why they ignored such a rule. This is likely  
240 exacerbated by the fact that authors or peer-reviewers can easily point out that this ‘rule of  
241 thumb’ exists (Gelman & Hill, 2006; Harrison, 2015; Kéry & Royle, 2015; Harrison et al.,  
242 2018), but may find it more difficult or time-consuming to make a nuanced argument against  
243 following such a pervasive rule. Hopefully the results presented here will challenge that view,  
244 and allow the fitting of random effects when inference is not being made for the random effects.  
245 It is critical to note that these results are far from comprehensive. Given the widespread

246 accessibility of GLMMs, future simulation studies and further assessments of these statistical  
247 methods are necessary to understand the consequences of both violating and blindly following  
248 ‘rules of thumb.’

249

## 250 **Acknowledgements**

251 I would like to thank the National Science Foundation (NSF) for funding (GRFP 2018268606),  
252 and to Boise State University for general support.

253

## 254 **References**

255 Bates D, Sarkar D, Bates MD, Matrix L. 2007. The lme4 package. *R package version 2:74*.

256 Bolker BM. 2008. *Ecological models and data in R*. Princeton University Press.

257 Bolker BM, Brooks ME, Clark CJ, Geange SW, Poulsen JR, Stevens MHH, White J-SS. 2009.

258 Generalized linear mixed models: a practical guide for ecology and evolution. *Trends in*  
259 *ecology & evolution* 24:127–135.

260 Gelman A. 2008. Scaling regression inputs by dividing by two standard deviations. *Statistics in*  
261 *medicine* 27:2865–2873.

262 Gelman A, Hill J. 2006. *Data analysis using regression and multilevel/hierarchical models*.  
263 Cambridge university press.

264 Harrison XA. 2015. A comparison of observation-level random effect and Beta-Binomial models  
265 for modelling overdispersion in Binomial data in ecology & evolution. *PeerJ* 3:e1114.

- 266 Harrison XA, Donaldson L, Correa-Cano ME, Evans J, Fisher DN, Goodwin CE, Robinson BS,  
267 Hodgson DJ, Inger R. 2018. A brief introduction to mixed effects modelling and multi-  
268 model inference in ecology. *PeerJ* 6:e4794.
- 269 Hurlbert SH. 1984. Pseudoreplication and the design of ecological field experiments. *Ecological*  
270 *monographs* 54:187–211.
- 271 Kass RE, Caffo BS, Davidian M, Meng X-L, Yu B, Reid N. 2016. *Ten simple rules for effective*  
272 *statistical practice*. Public Library of Science.
- 273 Kéry M, Royle JA. 2015. *Applied Hierarchical Modeling in Ecology: Analysis of distribution,*  
274 *abundance and species richness in R and BUGS: Volume 1: Prelude and Static Models*.  
275 Academic Press.
- 276 Low-Décarie E, Chivers C, Granados M. 2014. Rising complexity and falling explanatory power  
277 in ecology. *Frontiers in Ecology and the Environment* 12:412–418.
- 278 McElreath R. 2020. *Statistical rethinking: A Bayesian course with examples in R and Stan*. CRC  
279 press.
- 280 Powell LA, Gale GA. 2015. *Estimation of Parameters for Animal Populations*. Caught Napping  
281 Publications, Lincoln, NE.
- 282 R Core Team. 2017. *R: A language and environment for statistical computing*. Vienna, Austria:  
283 *R Foundation for Statistical Computing*.
- 284 Silk MJ, Harrison XA, Hodgson DJ. 2020. Perils and pitfalls of mixed-effects regression models  
285 in biology. *PeerJ* 8:e9522.
- 286 Wickham H. 2011. ggplot2. *Wiley Interdisciplinary Reviews: Computational Statistics* 3:180–  
287 185.

288 Zuur AF, Ieno EN. 2016. A protocol for conducting and presenting results of regression-type  
289 analyses. *Methods in Ecology and Evolution* 7:636–645.

290 Zuur AF, Ieno EN, Elphick CS. 2010. A protocol for data exploration to avoid common  
291 statistical problems. *Methods in ecology and evolution* 1:3–14.

292

293

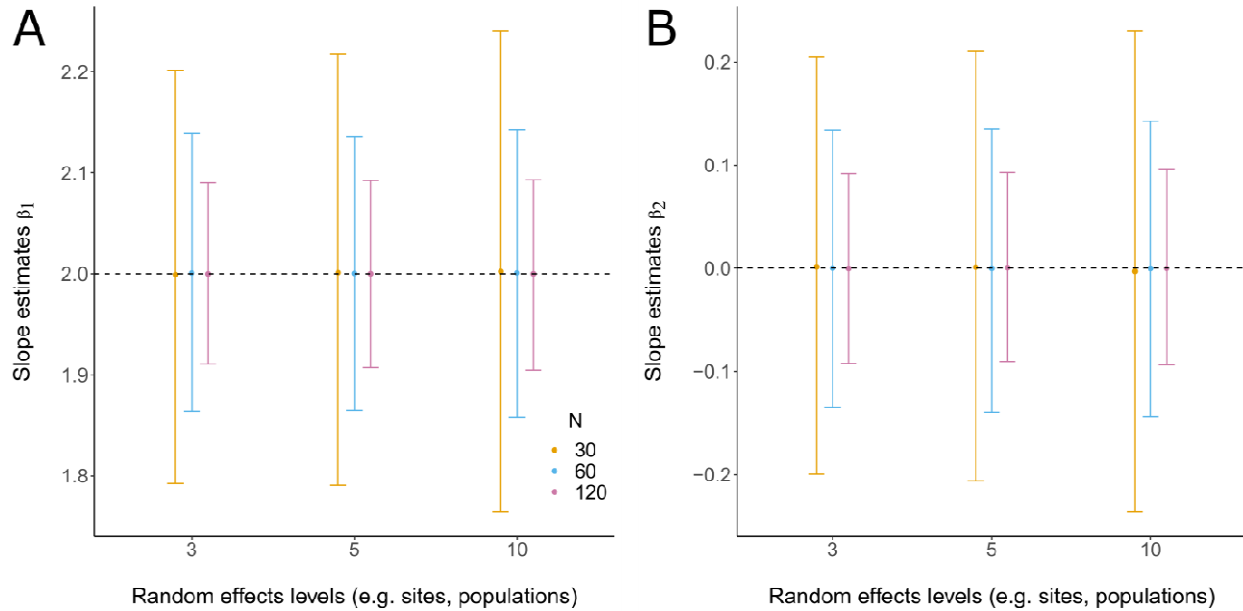

294

295 Figure 1: Fixed effects model estimates for simulated data. Each point is the mean estimate for  
296 10,000 models (and datasets), whereas error bars are 95% confidence intervals.  $N$  = the number  
297 of observations (i.e. number of rows) in each dataset. Dashed lines indicate the true value. In all  
298 scenarios the bias in parameter estimates are negligible. As the sample size increases, our  
299 certainty around the parameter estimates ( $\beta$ ) increases, but the number of random effects has a  
300 relatively minor effect on estimating  $\beta$ . When sample sizes ( $N$ ) are low, parameter uncertainty  
301 increases with increasing levels of random effects (assuming a consistent  $N$ ).

302



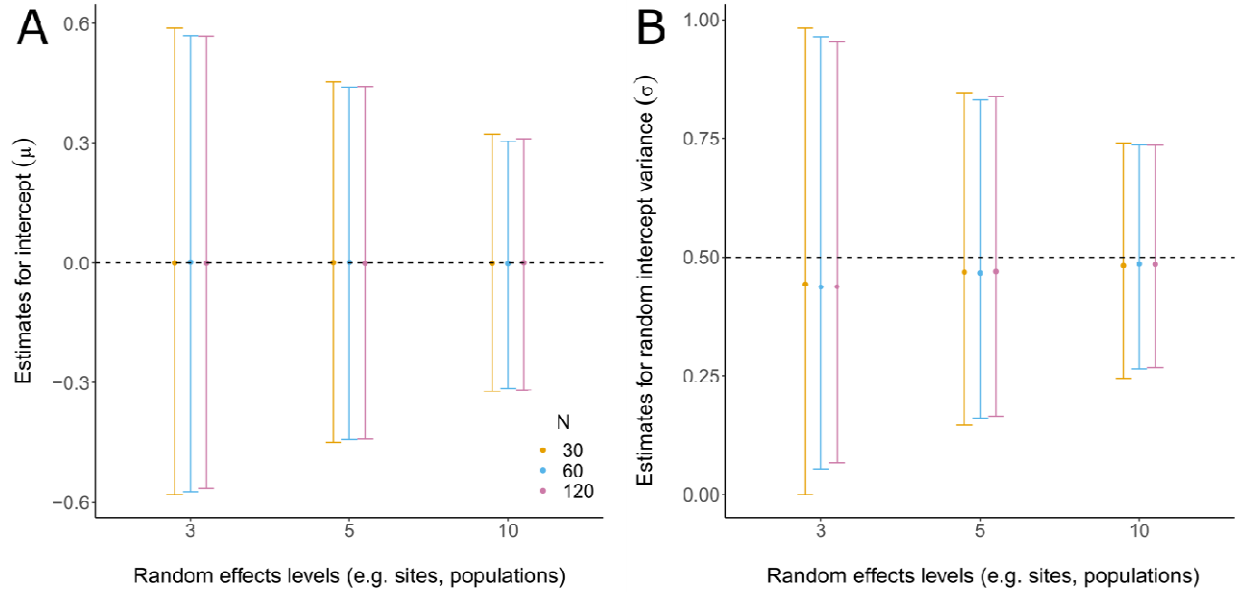

303

304 Figure 2: Random effects model estimates for simulated data. Each point is the mean estimate for

305 10,000 models (and datasets), whereas error bars are 95% confidence intervals. N = the number

306 of observations (i.e. number of rows) in each dataset. Dashed lines indicate the true value. A) As

307 the number of random effects levels increases, the uncertainty around the mean ( $\mu$ ) decreases.

308 Sample size has a relatively minor effect on estimating  $\mu$ . B) As the number of random effects

309 levels increases, the bias and uncertainty around the random effects variance ( $\sigma$ ) decreases.

310 Sample size has a small, but relatively minor effect on estimating  $\sigma$ . The bias in  $\sigma$  starts to

311 approach the starting (simulated)  $\sigma = 0.5$  as the number of random effects reaches 10.

312

313

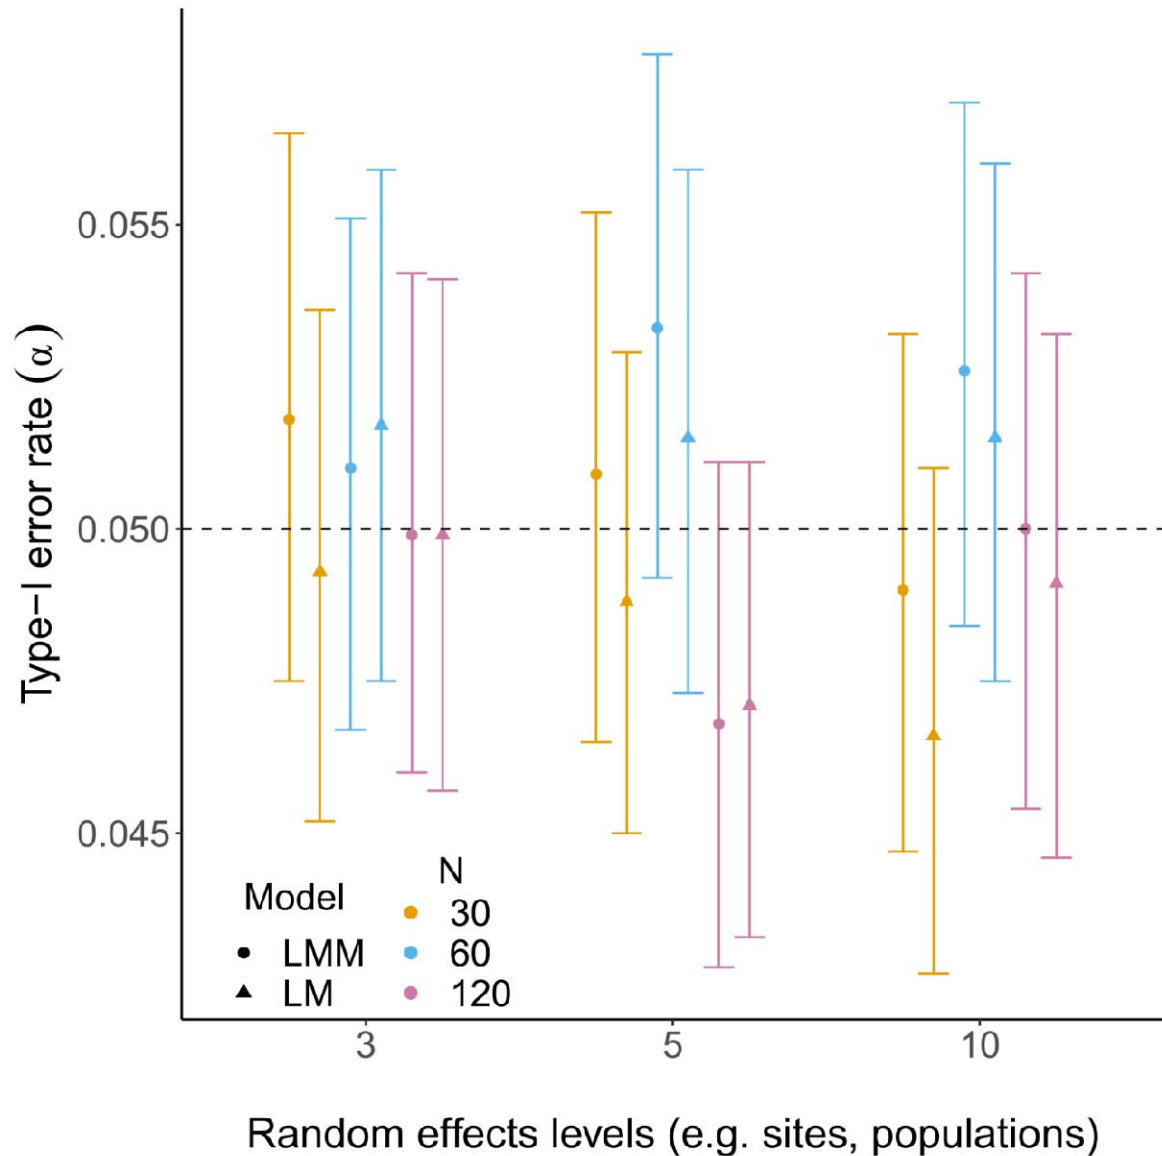

314

315 Figure 3: Type-I error for various linear models (LM) and linear mixed-effects models (LMM).

316 Type-I error rate was calculated as the proportion of models ( $n = 10,000$ ) in which a ‘significant’

317 p value of  $\leq 0.05$  was obtained for a parameter estimate in which the true value of that parameter

318 was set to be 0 (Figure 1B); each point represents this proportion. To generate error bars as 95%

319 confidence intervals, I used bootstrapping to replicate this process 1,000 times (see methods). N

320 = the number of observations (i.e. number of rows) in each dataset. Symbols indicate model type

321 (LM vs LMM). Dashed lines indicate the true alpha value (0.05).

322 Table 1: Model estimates from 10,000 simulated datasets. The number of levels of random effects (RE) was varied (3, 5, or 10), as  
 323 was the number of observations in the dataset ( $N = 30, 60, \text{ or } 120$ ). The true (T) values for the data generation process (equation 1) are  
 324 indicated in the second header row underneath the estimated parameter labels (fixed effects:  $\beta_1, \beta_2$ ; random effects:  $\mu, \sigma$ ). The mean of  
 325 10,000 model estimates ( $\beta_1, \beta_2, \mu, \sigma$ ) are indicated for the respective models below the true values. Lower and upper bounds on 95% confidence  
 326 intervals for each parameter is calculated as the 0.025 and 0.975 quantiles, respectively, of 1,000 bootstrapped replications (see methods).

| RE levels | N   | $\beta_1$ | $\beta_1$ 95% CI |       | $\beta_2$ | $\beta_2$ 95% CI |       | $\mu$  | $\mu$ 95% CI |       | $\sigma$ | $\sigma$ 95% CI |       |
|-----------|-----|-----------|------------------|-------|-----------|------------------|-------|--------|--------------|-------|----------|-----------------|-------|
|           |     | T = 2     | Lower            | Upper | T = 0     | Lower            | Upper | T = 0  | Lower        | Upper | T = 0.5  | Lower           | Upper |
| 3         | 30  | 1.999     | 1.792            | 2.202 | 0.001     | -0.199           | 0.205 | 0.000  | -0.580       | 0.589 | 0.443    | 0.000           | 0.982 |
| 5         | 30  | 2.001     | 1.790            | 2.217 | 0.001     | -0.207           | 0.211 | 0.001  | -0.450       | 0.454 | 0.468    | 0.147           | 0.846 |
| 10        | 30  | 2.002     | 1.764            | 2.241 | -0.003    | -0.237           | 0.230 | -0.001 | -0.322       | 0.324 | 0.482    | 0.245           | 0.739 |
| 3         | 60  | 2.001     | 1.864            | 2.139 | 0.000     | -0.135           | 0.134 | 0.002  | -0.573       | 0.569 | 0.437    | 0.053           | 0.964 |
| 5         | 60  | 2.000     | 1.865            | 2.136 | 0.000     | -0.140           | 0.135 | 0.001  | -0.443       | 0.441 | 0.466    | 0.161           | 0.831 |
| 10        | 60  | 2.001     | 1.858            | 2.143 | 0.000     | -0.144           | 0.142 | -0.002 | -0.314       | 0.305 | 0.485    | 0.265           | 0.736 |
| 3         | 120 | 2.000     | 1.910            | 2.090 | 0.000     | -0.093           | 0.091 | -0.001 | -0.565       | 0.568 | 0.438    | 0.067           | 0.954 |
| 5         | 120 | 2.000     | 1.907            | 2.093 | 0.000     | -0.091           | 0.093 | -0.001 | -0.442       | 0.443 | 0.469    | 0.164           | 0.838 |
| 10        | 120 | 2.000     | 1.905            | 2.093 | 0.000     | -0.094           | 0.096 | 0.000  | -0.318       | 0.311 | 0.485    | 0.267           | 0.735 |

327
